# Supplementary material for: Quality of care for non-communicable diseases in the Republic of Moldova: a survey across primary health care facilities and pharmacies
Source: Springer Nature journal article supplement (doi:10.1186/s12913-019-4180-4), 2019-06-04
Supplement: MOESM3 [file 16771652]

### III) QUALITY OF CARE ASSESSMENT – PATIENT RECORD STUDY PHCS - MOLDOVA

SURVEY QUESTIONNAIRE  
VERSION 7:1 9.06.2017

|                           |
|---------------------------|
| <b>Survey Information</b> |
|---------------------------|

| <b>Data collector and Location</b> | <b>Response</b>                                                                                                                                                                                                                  |
|------------------------------------|----------------------------------------------------------------------------------------------------------------------------------------------------------------------------------------------------------------------------------|
| Facility Name                      |                                                                                                                                                                                                                                  |
| Facility Type                      | <b>HC<br/>OMF</b>                                                                                                                                                                                                                |
| Raion name                         | Briceni<br>Cahul<br>Criuleni<br>Edineț<br>Fălești<br>Orhei<br>Ștefan Vodă<br>Taraclia<br>Ungheni<br>Vulcanesti<br>Cantemir<br>Căușeni<br>Cimișlia<br>Florești<br>Glodeni<br>Ialoveni<br>Leova<br>Rezina<br>Strășeni<br>Telenești |
| Raion ID -- <i>See list</i>        |                                                                                                                                                                                                                                  |
| Locality Name                      |                                                                                                                                                                                                                                  |
| Locality ID - <i>See list</i>      |                                                                                                                                                                                                                                  |
| Interviewer ID                     |                                                                                                                                                                                                                                  |
| start_time of interview            |                                                                                                                                                                                                                                  |

| SECTION 1 |                                                                                       | Patient records – with hypertension                                                                                             |                       |       |        |
|-----------|---------------------------------------------------------------------------------------|---------------------------------------------------------------------------------------------------------------------------------|-----------------------|-------|--------|
| 1.        | Questions                                                                             | Response                                                                                                                        |                       | Skips | Source |
| 2.        | Sex                                                                                   | Male<br>Female                                                                                                                  | 1<br>2                |       |        |
| 3.        | Age<br><br><i>The patient must be between 18 and 69 – Born between 1948 and 1999.</i> | _____                                                                                                                           |                       |       |        |
| 4.        | Insurance coverage                                                                    | Yes, and it is recorded<br>No, and it is recorded<br>No information in file<br>Unclear/unsure (poor recording)                  | 1<br>2<br>3<br>4      |       |        |
| 5.        | Health condition (other than hypertension)                                            | Diabetes<br>Ischemic heart disease<br>Other (please specify) _____<br>No information in file<br>Unclear/unsure (poor recording) | 1<br>2<br>3<br>4<br>5 |       |        |
| 6.        | Total number of visits for hypertension in the last 12 months                         | <u>(please specify)</u><br>No information in file<br>Unclear/unsure (poor recording)                                            | 1<br>2<br>3           |       |        |
| 7.        | Date on which diagnosis of hypertension was added to the patient health profile       | <u>(please specify)</u><br>No information in file<br>Unclear/unsure (poor recording)                                            | 1<br>2<br>3           |       |        |
| 8.        | Date on which treatment was first prescribed (for hypertension)                       | <u>please specify)</u>                                                                                                          | 1                     |       |        |

|     |                                                                         |                                                                                            |             |  |  |
|-----|-------------------------------------------------------------------------|--------------------------------------------------------------------------------------------|-------------|--|--|
|     |                                                                         | No information in file<br>Unclear/unsure (poor recording)                                  | 2<br>3      |  |  |
| 9.  | Names of hypertension medication taken by the patient (if applicable) ? | 1. _____<br>No information in file<br>Unclear/unsure (poor recording)                      | 1<br>2<br>3 |  |  |
| 10. | Date on which last hypertension medication was prescribed               | 1. _____<br>No information in file<br>Unclear/unsure (poor recording)                      | 1<br>2<br>3 |  |  |
| 11. | Which medication was prescribed (last prescription)                     | 2. _____<br>No information in file<br>Unclear/unsure (poor recording)                      | 1<br>2      |  |  |
| 12. | Date on which last consultation occurred (linked to hypertension)       | _____                                                                                      |             |  |  |
| 13. | Systolic blood pressure (linked to last visit)                          | _____<br>7777 if "No information in file" and<br>8888 if "Unclear/unsure (poor recording)" |             |  |  |
| 14. | Diastolic blood pressure (linked to last visit)                         | _____<br>7777 if "No information in file" and<br>8888 if "Unclear/unsure (poor recording)" |             |  |  |
| 15. | Weight (linked to last visit)                                           | -----<br>7777 if "No information in file" and<br>8888 if "Unclear/unsure (poor recording)" |             |  |  |
| 16. | BMI (linked to last visit)                                              | -----                                                                                      |             |  |  |

|     |                                                                                              |                                                                                                                |                  |                                                                           |  |
|-----|----------------------------------------------------------------------------------------------|----------------------------------------------------------------------------------------------------------------|------------------|---------------------------------------------------------------------------|--|
|     |                                                                                              | 7777 if "No information in file" and 8888 if "Unclear/unsure (poor recording)"                                 |                  |                                                                           |  |
| 17. | Waist circumference (linked to last visit)                                                   | -----<br>7777 if "No information in file" and 8888 if "Unclear/unsure (poor recording)"                        |                  |                                                                           |  |
| 18. | Is the patient recorded as pregnant during (linked to last visit)                            | Yes<br>No<br>Unclear/don't know                                                                                | 1<br>2<br>3      | This question should only appear if answer was 2, under question 2 (sex). |  |
| 19. | Height                                                                                       | _____ (cm)<br>7777 if "No information in file" and 8888 if "Unclear/unsure (poor recording)"                   |                  |                                                                           |  |
| 20. | In the past 12 months, has the cholesterol been measured by a doctor or other health worker? | Yes, and results are noted<br>Yes, but results are not in file<br>No information in file<br>Unclear/don't know | 1<br>2<br>3<br>4 |                                                                           |  |
| 21. | Is the patient a smoker?                                                                     | Yes, and it is recorded<br>No, and it is recorded<br>No information in file<br>Unclear/unsure (poor recording) | 1<br>2<br>3<br>4 | If 2, 3, 4, skip to question 23                                           |  |
| 22. | In the last 12 months, has the doctor offered advice on quitting smoking?                    | Yes, and it is recorded<br>No information in file<br>Unclear/unsure (poor recording)                           | 1<br>2<br>3      |                                                                           |  |

|     |                                                                                                                        |                                                                                                                                                                          |                  |  |  |
|-----|------------------------------------------------------------------------------------------------------------------------|--------------------------------------------------------------------------------------------------------------------------------------------------------------------------|------------------|--|--|
| 23. | Has the patient been diagnosed as having an issue with alcohol abuse?                                                  | Yes, and it is recorded<br>No, and it is recorded<br>No information in file<br>Unclear/unsure (poor recording)                                                           | 1<br>2<br>3<br>4 |  |  |
| 24. | In the last 12 months, has the doctor offered advice on alcohol consumption?                                           | Yes, and it is recorded<br>No information in file<br>Unclear/unsure (poor recording)                                                                                     | 1<br>2<br>3      |  |  |
| 25. | In the last 12 months, has the doctor offered advice on nutrition and diet?                                            | Yes, and it is recorded<br>No information in file<br>Unclear/unsure (poor recording)                                                                                     | 1<br>2<br>3      |  |  |
| 26. | In the last 12 months, has the patient participated in a 'school of patients' session on hypertension at the facility? | Yes, and it is fully recorded (both signatures)<br>Yes, and it is partially recorded (only signature of doctor)<br>No (form is empty)<br>Unclear/unsure (poor recording) | 1<br>2<br>3<br>4 |  |  |
| 27. | In the last 12 months, has the doctor offered advice on physical activity?                                             | Yes, and it is recorded<br>No information in file<br>Unclear/unsure (poor recording)                                                                                     | 1<br>2<br>3      |  |  |
| 28. | Was this medical record stored in an organized manner?                                                                 | Yes<br>No                                                                                                                                                                | 1<br>2           |  |  |
| 29. | Is the quality of the record keeping satisfactory in this medical record?                                              | Very satisfactory<br>Satisfactory<br>Unsatisfactory<br>Very unsatisfactory                                                                                               | 1<br>2<br>3<br>4 |  |  |

|     |                                                                                                          |                                                                               |             |  |  |
|-----|----------------------------------------------------------------------------------------------------------|-------------------------------------------------------------------------------|-------------|--|--|
|     |                                                                                                          |                                                                               |             |  |  |
| 30. | Is there a mention of the family history of hypertension in the file?                                    | Yes, and it is well recorded<br>Yes, but incomplete<br>No information in file | 1<br>2<br>3 |  |  |
| 31. | Interviewer comments:<br><br>PLEASE ADD ANY COMMENT YOU THINK WOULD BE USEFUL FOR THE PROGRAMME TO KNOW. | x                                                                             |             |  |  |
