# Supplementary material for: Quality of care for non-communicable diseases in the Republic of Moldova: a survey across primary health care facilities and pharmacies
Source: Springer Nature journal article supplement (doi:10.1186/s12913-019-4180-4), 2019-06-04
Supplement: MOESM4 [file 16771652]

Additional file 4. Infrastructure, cleanliness and maintenance

|                                                                                                                                              | Facility Type |         | Region  |         |         | N  |
|----------------------------------------------------------------------------------------------------------------------------------------------|---------------|---------|---------|---------|---------|----|
|                                                                                                                                              | HC            | FMO     | North   | Centre  | South   |    |
| <b>The facility and immediate surroundings (facility yard, waiting area outside) are free from long grass, paper debris and solid waste.</b> |               |         |         |         |         |    |
| Yes                                                                                                                                          | 90.91%        | 100.00% | 88.89%  | 100.00% | 90.48%  | 56 |
| No                                                                                                                                           | 9.09%         | 0.00%   | 11.11%  | 0.00%   | 9.52%   | 4  |
| <b>The facility has a rubbish bin which is properly used and not overflowing.</b>                                                            |               |         |         |         |         |    |
| Yes                                                                                                                                          | 95.45%        | 100.00% | 94.44%  | 100.00% | 95.24%  | 58 |
| No                                                                                                                                           | 4.55%         | 0.00%   | 5.56%   | 0.00%   | 4.76%   | 2  |
| <b>There is a designated waiting room for patients.</b>                                                                                      |               |         |         |         |         |    |
| Yes                                                                                                                                          | 97.73%        | 100.00% | 100.00% | 100.00% | 95.24%  | 59 |
| No                                                                                                                                           | 2.27%         | 0.00%   | 0.00%   | 0.00%   | 4.76%   | 1  |
| <b>The current waiting area is mopped, free of dust, trash; dirt, spider webs, and generally tidy.</b>                                       |               |         |         |         |         |    |
| Yes                                                                                                                                          | 95.35%        | 100.00% | 100.00% | 95.24%  | 95.00%  | 57 |
| No                                                                                                                                           | 4.65%         | 0.00%   | 0.00%   | 4.76%   | 5.00%   | 2  |
| <b>There is at least one designated consulting room for women.</b>                                                                           |               |         |         |         |         |    |
| Yes                                                                                                                                          | 100.00%       | 93.75%  | 94.44%  | 100.00% | 100.00% | 59 |
| No                                                                                                                                           | 0.00%         | 6.25%   | 5.56%   | 0.00%   | 0.00%   | 1  |
| <b>There is at least one designated consulting room for children.</b>                                                                        |               |         |         |         |         |    |
| Yes                                                                                                                                          | 88.64%        | 81.25%  | 83.33%  | 90.48%  | 85.71%  | 52 |
| No                                                                                                                                           | 11.36%        | 18.75%  | 16.67%  | 9.52%   | 14.29%  | 8  |
| <b>All examination room(s) ensure(s) privacy/confidentiality (door, window blind, curtain).</b>                                              |               |         |         |         |         |    |
| Yes                                                                                                                                          | 95.45%        | 81.25%  | 83.33%  | 90.48%  | 100.00% | 55 |
| No                                                                                                                                           | 4.55%         | 18.75%  | 16.67%  | 9.52%   | 0.00%   | 5  |

|                                                                                                                    |           |           |         |         |         |    |
|--------------------------------------------------------------------------------------------------------------------|-----------|-----------|---------|---------|---------|----|
| <b>All examination rooms are mopped, free of dust, trash; dirt, spider webs, and the rooms are generally tidy.</b> |           |           |         |         |         |    |
| Yes                                                                                                                | 95.45%    | 100.00%   | 94.44%  | 95.24%  | 100.00% | 58 |
| No                                                                                                                 | 4.55%     | 0.00%     | 5.56%   | 4.76%   | 0.00%   | 2  |
| <b>All examination rooms are well illuminated.</b>                                                                 |           |           |         |         |         |    |
| Yes                                                                                                                | 90.91%    | 87.50%    | 83.33%  | 85.71%  | 100.00% | 54 |
| No                                                                                                                 | 9.09%     | 12.50%    | 16.67%  | 14.29%  | 0.00%   | 6  |
| <b>The facility has electricity</b>                                                                                |           |           |         |         |         |    |
| Yes                                                                                                                | 100.00%   | 100.00%   | 100.00% | 100.00% | 100.00% | 60 |
| No                                                                                                                 | 0.00%     | 0.00%     | 0.00%   | 0.00%   | 0.00%   | 0  |
| <b>During the past 7 working days, did you have any power cuts of more than 1 hour during opening hours.</b>       |           |           |         |         |         |    |
| Yes                                                                                                                | 52.27%*   | 18.75%*   | 44.44%  | 33.33%  | 52.38%  | 26 |
| No                                                                                                                 | 47.73%    | 81.25%    | 55.56%  | 66.67%  | 47.62%  | 34 |
| <b>The facility has a functional generator</b>                                                                     |           |           |         |         |         |    |
| Yes                                                                                                                | 29.55%    | 6.25%     | 16.67%  | 28.57%  | 23.81%  | 14 |
| No                                                                                                                 | 70.45%    | 93.75%    | 83.33%  | 71.43%  | 76.19%  | 46 |
| <b>Does the facility have a functional communication equipment ?</b>                                               |           |           |         |         |         |    |
| Yes                                                                                                                | 100.00%   | 100.00%   | 100.00% | 100.00% | 100.00% | 60 |
| No                                                                                                                 | 0.00%     | 0.00%     | 0.00%   | 0.00%   | 0.00%   | 0  |
| <b>The facility has functional computer.</b>                                                                       |           |           |         |         |         |    |
| Yes                                                                                                                | 100.00%   | 93.75%    | 94.44%  | 100.00% | 100.00% | 59 |
| No                                                                                                                 | 0.00%     | 6.25%     | 5.56%   | 0.00%   | 0.00%   | 1  |
| <b>The facility has a functional printer.</b>                                                                      |           |           |         |         |         |    |
| Yes                                                                                                                | 97.73%*** | 68.75%*** | 83.33%  | 95.24%  | 90.48%  | 54 |
| No                                                                                                                 | 2.27%     | 31.25%    | 16.67%  | 4.76%   | 9.52%   | 6  |
| <b>The facility has internet access.</b>                                                                           |           |           |         |         |         |    |
| Yes                                                                                                                | 100.00%   | 75.00%    | 88.89%  | 100.00% | 90.48%  | 56 |
| No                                                                                                                 | 0.00%     | 25.00%    | 11.11%  | 0.00%   | 9.52%   | 4  |
| <b>During the past 7 working days did you have internet for at least 1 hour every day?</b>                         |           |           |         |         |         |    |

|     |         |         |         |         |         |    |
|-----|---------|---------|---------|---------|---------|----|
| Yes | 100.00% | 100.00% | 100.00% | 100.00% | 100.00% | 56 |
| No  | 0.00%   | 0.00%   | 0.00%   | 0.00%   | 0.00%   | 0  |

\*p<0.05, \*\*\* p<0.001
