# Supplementary material for: Quality of care for non-communicable diseases in the Republic of Moldova: a survey across primary health care facilities and pharmacies
Source: Springer Nature journal article supplement (doi:10.1186/s12913-019-4180-4), 2019-06-04
Supplement: MOESM5 [file 16771652]

Additional file 5. Water, sanitation and hygiene

|                                                                                                                                      | Facility Type |        | Region  |        |         | N     |
|--------------------------------------------------------------------------------------------------------------------------------------|---------------|--------|---------|--------|---------|-------|
|                                                                                                                                      | HC            | FMO    | North   | Centre | South   | N =60 |
| <b>Availability of running water in the facility (out of a tap).</b>                                                                 |               |        |         |        |         |       |
| Yes                                                                                                                                  | 100.00%       | 87.50% | 94.44%  | 95.24% | 100.00% | 58    |
| No                                                                                                                                   | 0.00%         | 12.50% | 5.56%   | 4.76%  | 0.00%   | 2     |
| <b>Availability of warm water (out of the tap).</b>                                                                                  |               |        |         |        |         |       |
| Yes                                                                                                                                  | 63.64%        | 64.29% | 52.94%  | 80.00% | 57.14%  | 37    |
| No                                                                                                                                   | 36.36%        | 35.71% | 47.06%  | 20.00% | 42.86%  | 21    |
| <b>Availability of functional washing points in examination rooms and/or entrance hall, and soap or hand disinfectants and water</b> |               |        |         |        |         |       |
| Yes                                                                                                                                  | 88.64%        | 78.57% | 82.35%  | 85.00% | 90.48%  | 50    |
| No                                                                                                                                   | 11.36%        | 21.43% | 17.65%  | 15.00% | 9.52%   | 8     |
| <b>Labelled containers for medical waste disposal are available in all required areas (e.g. examination rooms).</b>                  |               |        |         |        |         |       |
| Yes                                                                                                                                  | 97.73%        | 87.50% | 94.44%  | 90.48% | 100.00% | 57    |
| No                                                                                                                                   | 2.27%         | 12.50% | 5.56%   | 9.52%  | 0.00%   | 3     |
| <b>The facility has adequate and safe disposal of sharps (sharps box/container).</b>                                                 |               |        |         |        |         |       |
| Yes                                                                                                                                  | 97.73%        | 93.75% | 100.00% | 90.48% | 100.00% | 58    |
| No                                                                                                                                   | 2.27%         | 6.25%  | 0.00%   | 9.52%  | 0.00%   | 2     |
| <b>The facility has adequate and safe</b>                                                                                            |               |        |         |        |         |       |

|                                                                                                                                       |         |        |        |        |         |    |
|---------------------------------------------------------------------------------------------------------------------------------------|---------|--------|--------|--------|---------|----|
| <b>disposal of infectious waste.</b>                                                                                                  |         |        |        |        |         |    |
| Yes                                                                                                                                   | 97.73%  | 87.50% | 94.44% | 90.48% | 100.00% | 57 |
| No                                                                                                                                    | 2.27%   | 12.50% | 5.56%  | 9.52%  | 0.00%   | 3  |
| <b>Infectious waste is temporary stored at a protected place.</b>                                                                     |         |        |        |        |         |    |
| Yes                                                                                                                                   | 90.91%  | 87.50% | 94.44% | 90.48% | 85.71%  | 54 |
| No                                                                                                                                    | 9.09%   | 12.50% | 5.56%  | 9.52%  | 14.29%  | 6  |
| <b>Sharps waste is temporary stored at a protected place.</b>                                                                         |         |        |        |        |         |    |
| Yes                                                                                                                                   | 90.91%  | 87.50% | 94.44% | 90.48% | 85.71%  | 54 |
| No                                                                                                                                    | 9.09%   | 12.50% | 5.56%  | 9.52%  | 14.29%  | 6  |
| <b>There is regular and appropriate collection for infectious waste.</b>                                                              |         |        |        |        |         |    |
| Yes                                                                                                                                   | 93.18%  | 93.75% | 94.44% | 85.71% | 100.00% | 56 |
| No                                                                                                                                    | 6.82%   | 6.25%  | 5.56%  | 14.29% | 0.00%   | 4  |
| <b>There is regular and appropriate collection for sharps waste.</b>                                                                  |         |        |        |        |         |    |
| Yes                                                                                                                                   | 93.18%  | 93.75% | 94.44% | 85.71% | 100.00% | 56 |
| No                                                                                                                                    | 6.82%   | 6.25%  | 5.56%  | 14.29% | 0.00%   | 4  |
| <b>The facility has essential disinfectants and antiseptics.</b>                                                                      |         |        |        |        |         |    |
| Yes                                                                                                                                   | 100.00% | 87.50% | 94.44% | 95.24% | 100.00% | 58 |
| No                                                                                                                                    | 0.00%   | 12.50% | 5.56%  | 4.76%  | 0.00%   | 2  |
| <b>The facility has chlorine solution or other disinfectants to disinfect contaminated instruments in all required areas (e.g. in</b> |         |        |        |        |         |    |

|                                                                                     |         |         |        |        |        |    |
|-------------------------------------------------------------------------------------|---------|---------|--------|--------|--------|----|
| examination rooms).                                                                 |         |         |        |        |        |    |
| Yes                                                                                 | 88.64%  | 68.75%  | 77.78% | 76.19% | 95.24% | 50 |
| No                                                                                  | 11.36%  | 31.25%  | 22.22% | 23.81% | 4.76%  | 10 |
| <b>The facility has at least one accessible and functional toilet for patients.</b> |         |         |        |        |        |    |
| Yes                                                                                 | 93.18%  | 87.50%  | 88.89% | 90.48% | 95.24% | 55 |
| No                                                                                  | 6.82%   | 12.50%  | 11.11% | 9.52%  | 4.76%  | 5  |
| <b>The facility has at least one accessible and functional toilet for staff.</b>    |         |         |        |        |        |    |
| Yes, separate toilet                                                                | 65.91%* | 37.50%* | 44.44% | 66.67% | 61.90% | 35 |
| Yes, but the same toilet as for patients                                            | 27.27%  | 43.75%  | 44.44% | 23.81% | 28.57% | 19 |
| No                                                                                  | 6.82%   | 18.75%  | 11.11% | 9.52%  | 9.52%  | 6  |
| <b>The toilet(s) or latrine is clean.</b>                                           |         |         |        |        |        |    |
| Yes                                                                                 | 77.27%  | 62.50%  | 66.67% | 66.67% | 85.71% | 44 |
| No                                                                                  | 22.73%  | 37.50%  | 33.33% | 33.33% | 14.29% | 16 |
| <b>A washing point is available near the toilet or latrine.</b>                     |         |         |        |        |        |    |
| Yes                                                                                 | 81.82%  | 68.75%  | 72.22% | 80.95% | 80.95% | 47 |
| No                                                                                  | 18.18%  | 31.25%  | 27.78% | 19.05% | 19.05% | 13 |
| <b>Soap is available at the washing point near toilet or latrine.</b>               |         |         |        |        |        |    |
| Yes, liquid soap                                                                    | 63.64%  | 50.00%  | 55.56% | 66.67% | 57.14% | 36 |
| Yes, solid soap                                                                     | 2.27%   | 12.50%  | 5.56%  | 0.00%  | 9.52%  | 3  |

|    |        |        |        |        |        |    |
|----|--------|--------|--------|--------|--------|----|
| No | 34.09% | 37.50% | 38.89% | 33.33% | 33.33% | 21 |
|----|--------|--------|--------|--------|--------|----|

\*p<0.05
