# Supplementary material for: Quality of care for non-communicable diseases in the Republic of Moldova: a survey across primary health care facilities and pharmacies
Source: Springer Nature journal article supplement (doi:10.1186/s12913-019-4180-4), 2019-06-04
Supplement: MOESM6 [file 16771652]

Additional file 6. Knowledge of chronic disease management

| Knowledge area                                     | Correct response items                                     | Facility Type |            | Region     |            |            |       |
|----------------------------------------------------|------------------------------------------------------------|---------------|------------|------------|------------|------------|-------|
|                                                    |                                                            | HC            | FMO        | North      | Center     | South      | Total |
|                                                    |                                                            | Column N %    | Column N % | Column N % | Column N % | Column N % | Count |
| Knowledge of atrial fibrillation                   | Emergency cardioversion                                    | 29.55%        | 6.25%      | 27.78%     | 23.81%     | 19.05%     | 14    |
|                                                    | Digoxin                                                    | 63.64%        | 81.25%     | 55.56%     | 71.43%     | 76.19%     | 41    |
| Knowledge examination of a hypertensive patient    | Signs suggestive of secondary hypertension                 | 90.91%        | 75.00%     | 94.44%     | 71.43%*    | 95.24%*    | 52    |
|                                                    | Evidence of visceral obesity                               | 65.91%        | 62.50%     | 88.89%*    | 47.62%*    | 61.90%     | 39    |
| Knowledge stable ischemic heart disease            | Level of systolic and diastolic blood pressure             | 86.36%        | 81.25%     | 83.33%     | 76.19%     | 95.24%     | 51    |
|                                                    | Dyslipidemia                                               | 79.55%        | 81.25%     | 72.22%     | 76.19%     | 90.48%     | 48    |
|                                                    | High junction glucose of 5.5 mmol / l                      | 34.09%        | 56.25%     | 44.44%     | 57.14%*    | 19.05%*    | 24    |
| Knowledge hospitalization criteria type 2 diabetes | Old age                                                    | 47.73%        | 43.75%     | 61.11%     | 28.57%     | 52.38%     | 28    |
|                                                    | Decompensation of DZ, requiring insulin therapy;           | 79.55%        | 87.50%     | 94.44%     | 66.67%     | 85.71%     | 49    |
|                                                    | Precoma or diabetic coma (ketoacidosis, hypoglycaemia);    | 88.64%        | 100.00%    | 94.44%     | 85.71%     | 95.24%     | 55    |
|                                                    | Progression of vascular complications;                     | 79.55%        | 75.00%     | 61.11%*    | 76.19%     | 95.24%*    | 47    |
|                                                    | The need to educate the patient with the de novo diagnosis | 4.55%         | 0.00%      | 5.56%      | 0.00%      | 4.76%      | 2     |
| Knowledge mean glucose                             | Diabetes melitus                                           | 63.64%        | 56.25%     | 55.56%     | 57.14%     | 71.43%     | 37    |

\*p<0.05
