# Supplementary material for: Quality of care for non-communicable diseases in the Republic of Moldova: a survey across primary health care facilities and pharmacies
Source: Springer Nature journal article supplement (doi:10.1186/s12913-019-4180-4), 2019-06-04
Supplement: MOESM7 [file 16771652]

Additional file 7. Adherence to principles of clinical history taking, physical examination

|                                                                                                      | Gender of medical doctor |         | Facility Type |         | Region    |          |           | N (module b) |
|------------------------------------------------------------------------------------------------------|--------------------------|---------|---------------|---------|-----------|----------|-----------|--------------|
|                                                                                                      | Male                     | Female  | HC            | FMO     | North     | Centre   | South     |              |
|                                                                                                      |                          |         |               |         |           |          |           | N =180       |
| <b>Adherence to principles of clinical history taking and physical examination (Score out of 13)</b> | 10.60                    | 11.04   | 11.04         | 10.67   | 10.53     | 10.90    | 11.33     | 180          |
| The medical doctor:                                                                                  |                          |         |               |         |           |          |           |              |
| ... greets the client.                                                                               | 97.62%                   | 99.29%  | 99.25%        | 97.96%  | 100.00%   | 98.41%   | 98.44%    | 180          |
| ... sees the client in privacy/confidentiality                                                       | 83.33%*                  | 94.29%* | 93.23%        | 87.76%  | 87.27%*   | 88.89%   | 98.44%*   | 167          |
| ... makes the client comfortable (e.g. seat offered)                                                 | 88.10%                   | 94.29%  | 95.49%*       | 85.71%* | 92.73%    | 93.65%   | 92.19%    | 169          |
| ... asks the client about concerns, allows client to explain his/her health issue.                   | 95.24%                   | 99.29%  | 99.25%        | 95.92%  | 98.18%    | 98.41%   | 98.44%    | 179          |
| ... takes patient history (general history, specific to disease)                                     | 59.52%                   | 64.29%  | 62.41%        | 65.31%  | 52.73%*   | 60.32%   | 75.00%*   | 115          |
| ... asks open ended questions during history taking                                                  | 57.14%                   | 70.00%  | 66.92%        | 67.35%  | 52.73%*** | 61.90%*  | 84.38%*** | 122          |
| ... asks about any prescriptions the client is currently taking.                                     | 97.62%                   | 96.43%  | 97.74%        | 93.88%  | 98.18%    | 93.65%   | 98.44%    | 176          |
| ... listens to the client and responds to client questions.                                          | 97.62%                   | 96.43%  | 96.24%        | 97.96%  | 98.18%    | 96.83%   | 95.31%    | 176          |
| ... has the patient medical record at hand                                                           | 97.62%                   | 99.29%  | 99.25%        | 97.96%  | 100.00%   | 98.41%   | 98.44%    | 180          |
| ... uses the patient card for anamnesis                                                              | 85.71%                   | 90.71%  | 88.72%        | 91.84%  | 83.64%    | 88.89%   | 95.31%    | 163          |
| ... fills in special prescription form                                                               | 80.95%                   | 81.43%  | 84.21%        | 73.47%  | 83.64%    | 82.54%   | 78.13%    | 148          |
| ... fills in medical record                                                                          | 100.00%                  | 99.29%  | 99.25%        | 100.00% | 100.00%   | 98.41%   | 100.00%   | 181          |
| ... uses information system to input data about patient                                              | 19.05%                   | 19.29%  | 21.80%        | 12.24%  | 5.45%**   | 30.16%** | 20.31%    | 35           |

\* $p < 0.05$ , \*\* $p < 0.01$ , \*\*\* $p < 0.001$
